## **Association between preference and e-learning readiness among the Bangladeshi female nursing students in the COVID-19 pandemic: a cross-sectional study**

### **Authors name:**

Humayun Kabir<sup>a</sup>, Tajrin Tahrin Tonmon<sup>a, #</sup>, Md. Kamrul Hasan<sup>a, #, \*</sup>, Lila Biswas<sup>b</sup>, Md. Abul Hasnat Chowdhury<sup>b, Δ</sup>, Muhammad Didarul Islam<sup>c, Δ</sup>, Mamunur Rahman<sup>d, Δ</sup>, and Dipak Kumar Mitra<sup>a</sup>

### **Affiliations:**

<sup>a</sup>Department of Public Health, North South University, Dhaka- 1229, Bangladesh

<sup>b</sup>CRP Nursing College, Savar, Dhaka - 1343, Bangladesh

<sup>c</sup>Department of Gerontology and Geriatric Welfare, University of Dhaka - 1000, Bangladesh

<sup>d</sup>Department of Pharmacy, East West University, Dhaka-1212, Bangladesh

# Equal contribution

Δ Equal contribution

\*Corresponding author:

Md. Kamrul Hasan

Master's in Public Health

Department of Public Health

North South University

Plot 15, Block B, Bashundhara

Dhaka- 1229, Bangladesh

Email: [kamrul.hasan11@northsouth.edu](mailto:kamrul.hasan11@northsouth.edu); [kamrulhasanhridoy205@gmail.com](mailto:kamrulhasanhridoy205@gmail.com)

## **Abstract:**

### **Background**

The COVID-19 pandemic jeopardized the traditional academic learning calendars due to the closing of all educational institutions across the globe. To keep up with the flow of learning, most of the educational institutions shifted toward e-learning. However, the students' e-learning preference for various subdomains of e-learning readiness did not identify, particularly among the female nursing students' for a developing country like Bangladesh, where those domains pose serious challenges.

### **Results**

A cross-sectional study was conducted among the female nursing students' perceived e-learning readiness in subdomains of readiness; availability, technology use, self-confidence, and acceptance. The findings of the study revealed that the prevalence of preference for e-learning was 43.46%. The students did not prefer e-learning compared to 'prefer group' has significantly less availability of technology ( $\beta = -3.01$ , 95% CI: -4.46, -1.56), less use of technology ( $\beta = -3.08$ , 95% CI: -5.11, -1.06), less self-confidence ( $\beta = -4.50$ , 95% CI: -7.02, -1.98), less acceptance ( $\beta = -5.96$ , 95% CI: -7.76, -4.16) and less training need ( $\beta = -1.86$ , 95% CI: -2.67, -1.06). The age, degree, residence, parents' highest education, having a single room, having any eye problems were significantly associated with the variation of availability of technology, use of technology, self-confidence, acceptance, and training need of e-learning.

### **Conclusions**

The outcomes of the study could be helpful while developing an effective and productive e-learning infrastructure regarding the preparedness of nursing colleges for the continuation of academia in any adverse circumstances like the COVID-19 pandemic.

**Keywords:** COVID-19, e-learning, online learning, nursing student, readiness, preference

### **1. Background**

E-learning is addressed as web applications that enable the participation of individuals either distinctively or synergistically, involving collaborative digital medium and virtual classrooms to reciprocate lessons via online settings (Padalino and Peres 2007). Such pedagogical structure accedes the mentee to stay hooked asynchronously with academic learning activities continue

with the access of proper internet supplementation into the adapted devices (Horiuchi et al. 2009). Worldwide, healthcare educators were seen adapting this evolutionary method of education strategically with the help of continuously developed technologies as a distant instructional teaching component to share their knowledge and skills around the health communities (Beeckman et al. 2008). This required a fundamental shift of electronic device and internet-based teacher-learner reciprocity from the conventional physical presence-based education deliverance strategy (Horiuchi et al. 2009).

Both locally and internationally, increased interest in nursing educational programs continuation via e-learning is seen accelerating due to the concurrent need of timekeeping in mind the prime contents: quality, social distancing for emergency health occurrences, time flexibility, and cost-effectiveness (Sheen et al. 2008). In nursing, e-learning, when were accessible through hospital websites for the nurses, allowed them to widen their knowledge and skills by taking their required courses as the service deliverance heavily depends on their enriched cognizance. Besides, available nursing care information through the hospital websites implements the healthcare organizations to renovate professional and personal growth among the nursing community (Gega et al. 2007). The widely evident term e-learning facilitated the nursing learning system since the 1960s, according to the findings of the CAL (Computer-assisted learning) studies in the nursing literature where debates were persistent about the consolidated skill accretion of the nurses and the proficiency of conventional teaching methods within the clinical environment (Bloomfield et al. 2010). Ironically, e-learning had a greater drop-out rate than the traditional delivered education, despite the advantages, according to another study findings, due to the lack of computer competency, browser handling, unavailability of adequate technologies, and nursing students' acceptancy towards it (Mohamed Ali 2016). E-learning concentrates on three parts enormously, including the appropriate words used for the presentations, particularly the networking medium used and the pedagogic motive to bring constructive changes in people's lore (Mayer 2019). This learning system continued to grow with the growing interest of both faculty and pupils apart from the technical support upliftment with helping in courseware delivery (Beqiri et al. 2009). These online course delivery models can be both coeval and nonsynchronous (Chen 2016). Regardless of the models, e-learning was adhered to globally as the timely educational plan of action to adopt during the COVID-19 pandemic

caused by SARS-CoV-2 in medical and nursing education due to the ongoing campus closing period (Lahti et al. 2014; Fawaz and Samaha 2020; Hossain et al. 2021).

Though dissensions are present regarding the e-learning educational system, by ensuring the accessibility, affordability, and flexibility of this systems' teaching disquisition from both the disseminators' and receivers' sides, the learning capacity of the students can be developed for life-long study purposes (Dhawan 2020). The learning process should be utilized in accordance with the learners' necessity and capacity to accommodate, assess and contemplate the instructors' recitation (Heo and Han 2018). Students should be prioritized to be exiled to perform well while using the web-based educational method (Lahti et al. 2014). Although, it was found in a study that despite the training, e-learning could be depressive and stressful for visually impaired students (Lee and Oh 2017). To avoid these problems, specifications and standards using contents present in the LMS (Learning Management System) need to be created and accessed for the disabled people to access all the information given and overcome the sufferings (Guenaga et al. 2004). Similarly, a study observed that the quality of the training programs needs to be improved, and to develop the learning experience of the nursing students, training on generalized caregiving skills, knowledge, and self-efficacy of mental health should be provided (Irvine et al. 2007). From different points of view, in several studies, gender differences played some roles in perceiving e-learning acceptance (Ong and Lai 2006; Ramírez-Correa et al. 2015).

Moreover, perceived usage experience, the intention to learn, and the benefit of technology-based learning were found to be slightly lower among males than females (Ramírez-Correa et al. 2015). Similarly, a mixed-method study finding in Saudi Arabia, Mutambik et al. suggested gender divide investigations of e-learning readiness in deferent cultural setting (Mutambik et al. 2020). In addition, Bangladesh Nursing and Midwifery Council (BNMC) allows 90% of its seat for female students during admission.

In Bangladesh, very few studies were found investigating the barriers on its way to cope with the e-learning methods, which were not directly reporting the current situation of students' readiness towards the e-learning system and their preference for this reason. The recent pandemic has taught us to be prepared for all the time, especially to be skilled and efficient enough to continue the educational and professional activities virtually in case of emergencies. However, there was no baseline research on female nursing students. For the continuation and building of a more

sustainable nursing education system, in the current situation of a developing country like Bangladesh, e-learning readiness assessment is highly essential. Therefore, our study intended to explore the association between the preference and various domains (availability of technology, use of technology, acceptance, self-confidence, and training) of e-learning readiness among the Bangladeshi female nursing students with the hope to contribute to the educational system development to find newer tactics to deal with the found barriers in the steps of existing evidence. To achieve the aim of this study following research questions were articulately constructed:

1. What is the prevalence of e-learning preference among the female nursing students of Bangladesh?
2. Is there any association between preference and e-learning readiness subdomains among female nursing students?
3. What are the other variables associated with female nursing students' e-learning readiness subdomains?

## **2. Methods**

### **2.1. Study design**

A cross-sectional study was conducted between December 26, 2020, and January 11, 2021.

### **2.2. Study participants**

The study participants were all undergraduate female nursing students in Bangladesh. To reduce the recall bias, the inclusion criteria was the student who enrolled in e-learning at least in the last 30 days of this study period.

### **2.3. Data collection**

Data were collected online using “Google Form,” posting the questionnaire link on nursing students' social media groups (Facebook, Messenger, and WhatsApp) during the school closing period in Bangladesh due to the COVID-19 pandemic. Given the current situation, we followed convenience and snowball sampling methods and found 252 responses. Finally, a total 237 of completed responses were recruited for the analysis. A workflow describing the methodology of the research is presented in **Figure 2**.

### **2.4. Questionnaire development**

The questionnaire included whether the students were willing to participate in the study, an item on perhaps the students prefer e-learning, other variables, and a perceived e-learning readiness questionnaire. The first part of the questionnaire included an item on students' willingness to participate in the study. The second part consisted of preferred e-learning, device use, a single room, eye problems, and demographic information (age, type of institution, degree, residence, and parent's highest education). The preference of e-learning was accessed by binary (yes and no) response to a single item. Having any eye problems has been defined in the study; the student could not stay on screen longer. However, the third part of the questionnaire consisted perceived e-learning readiness questionnaire.

## **2.5. Measurement of perceived e-learning readiness**

The readiness of e-learning can be accessed by using 39 items of the perceived e-learning readiness questionnaire (score range: 39-195) (Ünal et al. 2014). A Model for assessing Students' Readiness for E-learning is presented in **Figure 1**. Numerous studies assessed university students' e-learning readiness using the tool previously (Akaslan and Law 2011a, b; Soydal et al. 2011). The questionnaire items were responded to a five-point Likert scale of 1 for "strongly disagree" and 5 for "strongly agree." The questionnaire primarily focused on five baseline subdomains of e-learning; availability of technology for e-learning (6 items), use of technology for e-learning (11 items), the self-confidence of e-learning (12 items), acceptance of e-learning (7 items), and training of e-learning (3 items). In our study, we considered all of the five subdomains of the e-learning readiness questionnaire. The probable score range of the questionnaire was 39 to 195, whereas our study found 36 to 192. This 39 items questionnaire showed excellent reliability in our study (Cronbach alpha= 0.94). None of the reliability coefficients (Cronbach alpha) of the subdomains were found less than 0.76 in this study are presented in **Table 3**.

## **2.6. Data analysis**

Descriptive statistics were performed for all variables. The perceived e-learning readiness questionnaire score was presented by mean, median, standard deviation (SD), and interquartile range (IQR). The reliability coefficient (Cronbach alpha) was calculated for the perceived e-learning readiness questionnaire. Multivariable linear regression models were fitted to find the association between students' e-learning preference and e-learning readiness subdomains. We

adjusted the models for participants' e-learning preferences with other variables. The dependent variables were e-learning readiness subdomains; availability of technology, use of technology, self-confidence, acceptance, and training. The independent variable was the preference of e-learning, and all other variables were included as covariates. The p-value <0.05 was considered statistically significant at a 95% confident interval. Data were analyzed by using statistical software STATA-16.

## 2.7. Ethical issue

The Ethical Review Broad of the Faculty of Life Science, North South University, approved this study. The reference number is 2021/OR-NSU/IRB/0601. The aim and objective of the study were explained on the first page of the questionnaire, and the respondents who were willing to participate were considered as respondents of this study.

## 3. Results:

**Table 1: Baseline characteristics of the study population (n=237)**

| <b>Characteristic</b>            | <b>n</b> | <b>% / IQR</b> |
|----------------------------------|----------|----------------|
| <b>Prefer</b>                    |          |                |
| No                               | 134      | 56.54          |
| Yes                              | 103      | 43.46          |
| <b>Median Age in year</b>        |          |                |
| <b>Age</b>                       | 21       | 20 - 22        |
| <20                              | 29       | 12.24          |
| 20-22                            | 156      | 78.06          |
| >22                              | 52       | 21.94          |
| <b>Type of institution</b>       |          |                |
| Private                          | 226      | 95.36          |
| Public                           | 11       | 4.64           |
| <b>Degree</b>                    |          |                |
| B.Sc. in Nursing                 | 67       | 28.27          |
| Diploma in Nursing               | 170      | 71.73          |
| <b>Residence</b>                 |          |                |
| Rural                            | 141      | 59.49          |
| Urban                            | 96       | 40.51          |
| <b>Parents highest education</b> |          |                |
| Bachelor's & above               | 41       | 17.30          |
| H.S.C                            | 128      | 54.01          |
| Primary                          | 68       | 28.69          |
| <b>Device use</b>                |          |                |
| Personal computer                | 6        | 2.53           |
| Handset                          | 231      | 97.47          |
| <b>Having a single room</b>      |          |                |

|                                |     |       |
|--------------------------------|-----|-------|
| No                             | 149 | 62.87 |
| Yes                            | 88  | 37.13 |
| <b>Having any eye problems</b> |     |       |
| No                             | 136 | 57.38 |
| Yes                            | 101 | 42.62 |

Note: IQR = interquartile range

### 3.1 Prevalence of preference and baseline characteristics of the study participants

The baseline characteristics of the study participants are presented in **Table 1**. In this cross-sectional study, 237 e-learning enrolled female nursing students were recruited. The prevalence of preference for e-learning was 43.46%. The median age of the participants was 21 (IQR: 20-22) years. Approximately 95% (n=226) of the participants were enrolled from private institutions and most of the students, 71.73% (n=170), were from a diploma in nursing background. The majority of the participants, about 59% (n=141), were from the rural areas of Bangladesh. About 54% (n=128) had higher secondary certificates (H.S.C.) Most of the participants, 63% (n=149), had no single room for e-learning. However, around 42% (n=101) of the respondents reported having any eye problems.

**Table 2: Descriptive statistics of e-learning readiness questionnaire (n=237)**

| Scale                      | Mean  | Median | SD   | IQR   | Cronbach alpha |
|----------------------------|-------|--------|------|-------|----------------|
| Availability of technology | 16.08 | 15     | 5.90 | 12-21 | 0.84           |
| Use of technology          | 33.61 | 33     | 7.75 | 29-38 | 0.77           |
| Self-confidence            | 37.89 | 38     | 9.94 | 32-45 | 0.88           |
| Acceptance                 | 21.90 | 22     | 7.40 | 16-28 | 0.92           |
| Training                   | 10.76 | 11     | 2.96 | 9-13  | 0.76           |

### 3.2. Descriptive statistics of the e-learning readiness questionnaire

The descriptive statistics and Cronbach alpha of the subdomains of the e-learning readiness questionnaire are presented in **Table 2**. The mean scores of availability of technology, use of technology, self-confidence, acceptance, and training were found 16.08 (SD: 5.90), 33.61 (SD: 7.75), 37.89 (SD: 9.94), 21.90 (SD: 7.40), and 10.76 (SD: 2.96), respectively.



1 **Table 3: Association between e-learning preference and e-learning readiness and with other variables (n=237)**

| Variables                        | Availability of technology |        |       |                   | Use of technology |        |       |              | Self-confidence |        |       |              | Acceptance |        |       |                   | Training |        |       |                   |
|----------------------------------|----------------------------|--------|-------|-------------------|-------------------|--------|-------|--------------|-----------------|--------|-------|--------------|------------|--------|-------|-------------------|----------|--------|-------|-------------------|
|                                  | $\beta$                    | 95% CI |       | p                 | $\beta$           | 95% CI |       | p            | $\beta$         | 95% CI |       | p            | $\beta$    | 95% CI |       | p                 | $\beta$  | 95% CI |       | p                 |
|                                  |                            | LL     | UL    |                   |                   | LL     | UL    |              |                 | LL     | UL    |              |            | LL     | UL    |                   |          | LL     | UL    |                   |
| <b>Prefer</b>                    |                            |        |       |                   |                   |        |       |              |                 |        |       |              |            |        |       |                   |          |        |       |                   |
| No                               | -3.01                      | -4.46  | -1.56 | <b>&lt; 0.001</b> | -3.08             | -5.11  | -1.06 | <b>0.003</b> | -4.50           | -7.02  | -1.98 | <b>0.001</b> | -5.96      | -7.76  | -4.16 | <b>&lt; 0.001</b> | -1.86    | -2.67  | -1.06 | <b>&lt; 0.001</b> |
| Yes                              | Reference                  |        |       |                   | Reference         |        |       |              | Reference       |        |       |              | Reference  |        |       |                   |          |        |       |                   |
| <b>Age</b>                       |                            |        |       |                   |                   |        |       |              |                 |        |       |              |            |        |       |                   |          |        |       |                   |
| <20                              | Reference                  |        |       |                   | Reference         |        |       |              | Reference       |        |       |              | Reference  |        |       |                   |          |        |       |                   |
| 20 - 22                          | -0.07                      | -2.15  | 2.02  | 0.949             | 1.98              | -0.93  | 4.90  | 0.182        | 1.59            | -2.04  | 5.22  | 0.389        | 0.10       | -2.50  | 2.70  | 0.940             | 0.28     | -0.88  | 1.44  | 0.637             |
| >22                              | 2.73                       | 0.33   | 5.14  | <b>0.026</b>      | 4.30              | 0.93   | 7.66  | 0.013        | 5.78            | 1.59   | 9.97  | <b>0.007</b> | 2.33       | -0.67  | 5.32  | 0.127             | 0.56     | -0.78  | 1.89  | 0.412             |
| <b>Institution type</b>          |                            |        |       |                   |                   |        |       |              |                 |        |       |              |            |        |       |                   |          |        |       |                   |
| Public                           | Reference                  |        |       |                   | Reference         |        |       |              | Reference       |        |       |              | Reference  |        |       |                   |          |        |       |                   |
| Private                          | -1.66                      | 4.92   | 1.59  | 0.315             | 1.52              | -3.04  | 6.08  | 0.512        | -3.90           | -9.56  | 1.77  | 0.177        | 0.45       | -3.60  | 4.51  | 0.826             | -0.78    | -2.59  | 1.03  | 0.398             |
| <b>Degree</b>                    |                            |        |       |                   |                   |        |       |              |                 |        |       |              |            |        |       |                   |          |        |       |                   |
| B.Sc.                            | -2.83                      | -4.47  | -1.18 | <b>0.001</b>      | 0.41              | -1.90  | 2.71  | 0.729        | 1.57            | -1.29  | 4.43  | 0.281        | -2.69      | -4.73  | -0.64 | <b>0.010</b>      | -0.66    | -1.58  | 0.25  | 0.154             |
| Diploma                          | Reference                  |        |       |                   | Reference         |        |       |              | Reference       |        |       |              | Reference  |        |       |                   |          |        |       |                   |
| <b>Residence</b>                 |                            |        |       |                   |                   |        |       |              |                 |        |       |              |            |        |       |                   |          |        |       |                   |
| Rural                            | -1.48                      | -2.86  | -0.09 | <b>0.037</b>      | -2.43             | -4.37  | -0.49 | <b>0.014</b> | -1.43           | -3.84  | 0.99  | 0.246        | -1.62      | -3.35  | 0.11  | 0.066             | 0.10     | -0.68  | 0.87  | 0.807             |
| Urban                            | Reference                  |        |       |                   | Reference         |        |       |              | Reference       |        |       |              | Reference  |        |       |                   |          |        |       |                   |
| <b>Parents highest education</b> |                            |        |       |                   |                   |        |       |              |                 |        |       |              |            |        |       |                   |          |        |       |                   |
| Bachelors & above                | 2.47                       | 0.29   | 4.64  | <b>0.027</b>      | 3.98              | 0.93   | 7.03  | <b>0.011</b> | 5.33            | 1.54   | 9.12  | <b>0.006</b> | 1.71       | -1.00  | 4.42  | 0.216             | 0.46     | -0.75  | 1.67  | 0.455             |
| H.S.C                            | 1.06                       | -0.48  | 2.60  | 0.177             | 2.21              | 0.05   | 4.37  | <b>0.045</b> | 3.58            | 0.90   | 6.27  | <b>0.009</b> | 1.31       | -0.61  | 3.23  | 0.179             | 0.56     | -0.30  | 1.41  | 0.204             |
| Primary                          | Reference                  |        |       |                   | Reference         |        |       |              | Reference       |        |       |              | Reference  |        |       |                   |          |        |       |                   |
| <b>Device use</b>                |                            |        |       |                   |                   |        |       |              |                 |        |       |              |            |        |       |                   |          |        |       |                   |
| Handset                          | -1.81                      | -6.27  | 2.65  | 0.425             | -3.63             | -9.87  | 2.62  | 0.254        | -0.76           | -8.53  | 7.02  | 0.848        | 2.61       | -2.95  | 8.16  | 0.356             | -0.52    | -3.00  | 1.97  | 0.683             |
| Personal computer                | Reference                  |        |       |                   | Reference         |        |       |              | Reference       |        |       |              | Reference  |        |       |                   |          |        |       |                   |
| <b>Having a single room</b>      |                            |        |       |                   |                   |        |       |              |                 |        |       |              |            |        |       |                   |          |        |       |                   |
| No                               | -2.01                      | -3.50  | -0.53 | <b>0.008</b>      | -0.62             | -2.70  | 1.45  | 0.554        | -1.96           | -4.55  | 0.62  | 0.136        | -1.08      | -2.93  | 0.76  | 0.249             | 0.50     | -0.33  | 1.32  | 0.238             |
| Yes                              | Reference                  |        |       |                   | Reference         |        |       |              | Reference       |        |       |              | Reference  |        |       |                   |          |        |       |                   |
| <b>Having any eye problems</b>   |                            |        |       |                   |                   |        |       |              |                 |        |       |              |            |        |       |                   |          |        |       |                   |
| No                               | Reference                  |        |       |                   | Reference         |        |       |              | Reference       |        |       |              | Reference  |        |       |                   |          |        |       |                   |
| Yes                              | -1.91                      | -3.31  | -0.52 | <b>0.007</b>      | -1.02             | -2.97  | 0.93  | 0.303        | -1.99           | -4.41  | 0.44  | 0.108        | -2.26      | -4.00  | -0.53 | <b>0.011</b>      | -0.60    | -1.37  | 0.18  | 0.132             |

2 Note: CI, confidence interval, LL = lower limit, UL = upper limit

### 3 **3.3 Association between preference and female nursing students' availability of technology**

4 In **Table-3**, the results revealed that e-learning non-preferring students had significantly less  
5 availability of technology for e-learning ( $\beta = -3.01$ , 95% CI: -4.46, -1.56,  $p < 0.001$ ) compared to  
6 preferring group. The older age group ( $> 22$  years) was found significantly having more  
7 availability of technology ( $\beta = 2.73$ , 95% CI: 0.33, 5.14,  $p = 0.026$ ) compared to younger age ( $<$   
8 20 years) students. However, compared to diploma degree, the students from B.Sc. degree were  
9 found to have less availability of technology significantly ( $\beta = -2.83$ , 95% CI: -4.47, -1.18,  $p =$   
10 0.001). The students enrolled e-learning from rural area compared to urban was found  
11 significantly having less availability of technology ( $\beta = -1.48$ , 95% CI: -2.86, -0.09,  $p = 0.037$ ).  
12 The parents' highest education bachelor's and above compared to primary education was found  
13 to have more technology availability ( $\beta = 2.47$ , 95% CI: 0.29, 4.46,  $p = 0.027$ ). On the other  
14 hand, not having a single room was shown to have significantly less technology availability ( $\beta =$   
15 -2.01, 95% CI: -3.50, -0.53,  $p = 0.008$ ).

### 16 **3.4 Association between preference and female nursing students' use of technology**

17 In this study, compared to prefer group the students who non-prefer e-learning were found  
18 significantly less use of technology for e-learning ( $\beta = -3.08$ , 95% CI: -5.11, -1.06,  $p = 0.003$ ) (in  
19 **Table-3**). The older age group ( $> 22$  years) was found significantly having more use of  
20 technology ( $\beta = 4.30$ , 95% CI: 0.93, 7.66,  $p = 0.013$ ) compared to younger ( $< 20$  years). The  
21 urban students were found significantly having less use of technology ( $\beta = 3.98$ , 95% CI: 0.93,  
22 7.03,  $p = 0.014$ ) compared to rural. The parents' highest education bachelors and above was  
23 found significantly having more use of technology ( $\beta = 3.98$ , 95% CI: 0.93, 7.03,  $p = 0.011$ ).  
24 Similarly, parents' highest education H.S.C. compared to primary education found significantly  
25 having more use of technology ( $\beta = 2.21$ , 95% CI: 0.05, 4.37,  $p = 0.045$ ).

### 26 **3.5 Association between preference and female nursing students' self-confidence**

27 In **Table-3**, self-confidence of e-learning ( $\beta = -4.50$ , 95% CI: -7.02, -1.98,  $p = 0.001$ ) was found  
28 significantly less among the non-preferring group compared to the preferring e-learning group.  
29 The older age students ( $> 22$  years) were found significantly having more self-confidence ( $\beta =$   
30 5.78, 95% CI: 1.59, 9.97,  $p = 0.007$ ). Significantly more self-confidence ( $\beta = 5.33$ , 95% CI: 1.54,  
31 9.12,  $p = 0.006$ ) was found among the students whose parents' highest education was bachelors  
32 and above compared to primary education.

### 33 **3.6 Association between preference and female nursing students' acceptance**

34 In **Table-3**, significantly less acceptance of e-learning ( $\beta = -5.96$ , 95% CI: -7.76, -4.16,  $p <$   
35 0.001) was observed among the non-preferring students compared to preferring e-learning  
36 students. The B.Sc. degree holders acceptance was found significantly less ( $\beta = -2.69$ , 95% CI: -  
37 4.73, -0.64,  $p = 0.010$ ) compared to diploma degree holders. However, less acceptance was  
38 found among having any eye problems students compared to not having ( $\beta = -2.26$ , 95% CI: -  
39 4.00, -0.53,  $p = 0.011$ ) any eye problems.

### 40 **3.7 Association between preference and female nursing students' training need**

41 In **Table-3**, the results show that the non-preferring students' training need was found  
42 significantly less ( $\beta = -1.86$ , 95% CI: -2.67, -1.06,  $p < 0.001$ ) compared to the students who  
43 prefer e-learning.

## 44 **4. Discussion**

45 This study investigated the prevalence of e-learning preference and its association with the e-  
46 learning readiness domains and addressed the associated variables among the female nursing  
47 students of Bangladesh.

48 The study results showed that among all the participants, more than half of the students did not  
49 prefer e-learning. When we tried to figure out the factors that may affect this prevalence, it was  
50 observed that less acceptance and lack of self-confidence are two significant reasons for non-  
51 preferring e-learning among female nursing students. In addition, lack of technology usage, non-  
52 availability, and lack of training was also significantly associated with the non-preference. In this  
53 study, age differences, degree variation, residency, not having a single room while having online  
54 classes, and having any eye problems are also evidently associated with the non-preference  
55 among the female nursing students. In this study, 97.47% of the students used a handset (mobile  
56 phone, tablet) for e-learning. Albeit, availability of advanced technology is an integral part of e-  
57 learning, a study found, in a developed country (Hong Kong), during the COVID-19 pandemic,  
58 slightly more than half (66.6%) of the students attending online class via desktop or laptop and  
59 only 22.4% via mobile phone (Ho et al. 2021). Therefore, it can be said that the availability of  
60 technology is widely varied in developing versus developed countries.

61 The results of this cross-sectional study are consistent with earlier reports showing the effects of  
62 a higher frequency of not adopting e-learning due to several reasons. Those are readiness and

63 other technological factors that significantly affect the study population. The perceived readiness  
64 of mind contemplates a person's capability to inculcate e-learning in themselves (Al-Amin et al.  
65 2021). Thus, a learner's acceptance of using the newer technology-based method and the  
66 person's self-efficacy is the impactful factors affecting the growth of e-learning. In this study, the  
67 students' perception of readiness was reported similarly following other studies conducted in  
68 different circumstances, confirming this significant association claim (Mohamed Ali 2016;  
69 Bigirwa et al. 2020).

70 A study conducted in the context of the effectiveness of e-learning in Bangladesh showed that e-  
71 learning is a valuable system for the students' pedagogical development. Nevertheless, the  
72 students' perception of the lack of acceptance, technological efficacy, and motivation could  
73 hinder this development. It is one of the prime indicators of our study investigating the factors  
74 affecting the female nursing students' readiness to adopt e-learning (Ali et al. 2018). A  
75 systematic review on nursing education revealed that students with higher satisfaction and  
76 performance were more prone to acceptance of web-based education (Du et al. 2013). Similarly,  
77 studies found that self-efficacy was significantly positively correlated with the success of e-  
78 learning (Yukselturk and Bulut 2007). In this study, the non-preference group showed a lower  
79 level of self-confidence toward e-learning.

80 Along with a high-performance score, a higher level of self-efficacy was observed among  
81 nursing students (Rouleau et al. 2019). Alongside, motivational training intervention fine-tuned  
82 their positive attitude toward e-learning (Rouleau et al. 2019). Henceforth, the current study  
83 found lower training needs among the female nursing students with non-preference of e-learning.  
84 However, the research found that training skills and ICT (Information Communication and  
85 Technology) metacognition skills improve learners' level of achievement (Zimmerman et al.  
86 1994; Salehi et al. 2014; Abdelrahman 2020).

87 To digitalize Bangladesh, the internet-based education system is expanding country-wide, but  
88 overseeing the access to the information and the programs, lagging behind the female nursing  
89 students of the nation to be more familiar with the system, which could be causing the lackings  
90 in preparing themselves to prefer the e-learning system more enthusiastically. A study conducted  
91 in Vienna also reported similar problems with e-learning adaptation similar to this study's  
92 findings (Coopasami et al. 2017). This study showed that students aged more than 22 years were

93 more inclined to prefer e-learning as they were more confident and had the technological support  
94 more available than the younger students. Wherewith slight inconsistency, H. Pillay et al.  
95 reported that students more than 40 years were with less self-efficacy and technological skills,  
96 and the younger age groups less than 25 years possess higher capability on both of these  
97 constructs (Pillay et al. 2007). From our country's perspective, it could be explained that as more  
98 the students become experienced and exposed to this newer technology, they tend to use more of  
99 it. Hence this group will find it more available.

100 In this study, the association was found significant between educational degree variation and the  
101 lack of readiness in all the subdomains except for technology and self-confidence. It showed they  
102 (B.Sc. degree) have a lack of availability of technology and acceptance instead. Several studies  
103 around the globe on e-learning preference and readiness also found a significant association with  
104 the concerned factors (Smith 2005; Wei and Chou 2020). Similarly, a study conducted in the  
105 same context among the midwives learners had shown significant differences where the higher  
106 degree holders with more experiences showed more tendency to accept the e-learning than the  
107 junior degree holders (Ngampornchai and Adams 2016). In addition, during the COVID-19  
108 pandemic, routine academic yearly examinations of the diploma degree were conducted by  
109 BNMC like the one the previous years based on e-learning.

110 On the contrary, the B.Sc. degree is run by public universities, and based on e-learning  
111 assessment, no yearly examinations have been conducted yet ([CSL STYLE ERROR: reference  
112 with no printed form.]). Therefore, lower e-learning acceptance might be found high among the  
113 B.Sc. degree students, which might explain why the academic year muddled up. However, the  
114 lower e-learning acceptance might be declined their perceived availability of technology.

115 A relatively higher tendency of the students to use smartphones was found to be more prone to  
116 accept online learning in the USA and India studies. The present study differs from those studies  
117 and could not find any significant association between preference and e-learning readiness  
118 according to availability, use of technology, and self-efficacy. In addition, the factor 'device use'  
119 has no association with readiness (Kobayashi 2017; T et al. 2020).

120 Rasha A. examined that environment affects learning (Raman 2016). Our study has not found  
121 any significant association between having a single room and its effect on the lack of e-learning  
122 readiness. However, it showed that those who were not having a single room lacked technology

123 availability. Similarly, Ivwighreghweta et al., (2014) observed that most participants in Nigeria  
124 prefer to access e-learning in a quiet and calm environment like cybercafes (Ivighreghweta and  
125 Igere 2014).

126 This study also suggested that the lack of readiness for e-learning is also, to some extent,  
127 significantly associated with the residency of the female nursing students. In a similar study  
128 conducted in India, T. Muthuprasad et al., (2020) reported that the majority of the students living  
129 in a rural setting are associated significantly with the lack of readiness due to unavailability and  
130 self-efficacy, and another study also found the residency to be a potential factor in this regard  
131 (Elnakeeb et al. 2016). The advancement of technology and availability of it, with the speed it  
132 has reached the urban areas, did not find reaching in rural settings. Thus, the students studying  
133 from a rural setting perceiving online education are not privileged with available technical  
134 support and thus not enough confidence to use it. It was shown in the present study that the types  
135 of the university did not have any significant association with readiness. At the same time, a  
136 study in Kenya had also shown similar outcomes by reporting that both private and public  
137 universities were adopting the e-learning technique for educational deliverance (Neema-Abooki  
138 and Kitawi 2014).

139 However, in this study, having any eye problems showed significant association with having lack  
140 of availability of technology and being less acceptant towards the e-learning preparedness. A  
141 study addressing the problem faced by the disadvantaged people similarly showed that e-learning  
142 readiness, including self-confidence, acceptance, and technical availability, influenced their  
143 preference for technology-based learning (Hsieh et al. 2008). Insufficient instructional study for  
144 disadvantaged people, including people having physical discomfort like having eye problems in  
145 general, makes it difficult for them to endorse the technology-based pedagogy.

146 A significant number of participants in this study did not prefer e-learning, and their readiness  
147 was low. Thus, after completing the degree, 'up to the mark' professional development will be  
148 questioned. Our study finding is supported by Ho et al., who found that students' competence in  
149 technology predicted e-learning preference significantly during the COVID-19 pandemic (Ho et  
150 al. 2021). Therefore, strategies should be implemented to strengthen educational policies  
151 regarding the e-learning readiness of the students. Similarly, e-learning readiness should be

152 examined broadly by other developing countries worldwide in considering students' future  
153 professional development and to mitigate potential learning gaps due to the ongoing pandemic.

154

## 155 **5. Strength and limitation**

156 Very few studies were found conducting the effectiveness of the e-learning for the Bangladeshi  
157 students, where no such studies were explicitly found investigating the efficacy of this method  
158 among the female nursing students of Bangladesh so far, which is a strength of this study.  
159 However, a study was found reporting the effectiveness of online learning, and the study  
160 considered a limited number of variables where the factors affecting the readiness for e-learning  
161 systems were not covered with a wide range of variables.

162 Although a readiness evaluation is essential, this research only highlighted the five aspects of  
163 readiness: the availability of technology, use of technology, self-confidence, acceptance, and  
164 training. As it was a cross-sectional study, the study could not investigate the range of its  
165 variables over a large group of female nursing students. Hence, it is recommended for future  
166 research to assess the various other readiness factors (sociological, environmental, human  
167 resource, financial, and content) on a larger scale study to report how ready the female nursing  
168 students of Bangladesh are to implement e-learning.

## 169 **6. Conclusions**

170 To reduce the spread of COVID-19, the closing of academic institutions and the introduction of  
171 e-learning were appreciated globally. Nevertheless, it may not be easy to assume that everyone is  
172 welcoming e-learning initiatives in a developing country like Bangladesh and ready enough. This  
173 study documented female nursing students' preference for e-learning and its' significant  
174 association between different subdomains of readiness in terms of availability of technology, use  
175 of technology, self-confidence, and acceptance. The study's outcome showed that students'  
176 preference has a significant association with the readiness of e-learning. The findings also  
177 suggested that other associated variables varied the e-learning readiness domains. This study's  
178 findings might fill the gap of no baseline information about Bangladeshi nursing students' e-  
179 learning readiness, particularly females.

180

181 **List of abbreviations:** COVID-19: Corona Virus-19

182 **Ethics approval and consent to participate**

183 The Institutional Review Board (IRB) of North South University, Bangladesh, approved the  
184 current study. The purpose of the study was explained on the first page of the survey, and the  
185 respondents were asked on the first question whether they were willing to participate in the study  
186 and those selected ‘yes’ as written consent were considered to participate in the study.

187 **Consent for publication**

188 Not applicable.

189 **Availability of Data Materials**

190 Dataset used in this study will be available as per request (mailing to the corresponding author).

191 **Competing interest**

192 The authors report no competing interest. The authors alone are responsible for the content and  
193 writing of this article.

194 **Funding**

195 No funding from any public, private or non-profit research agency was received for this study.

196 **Author Contributions**

197 Conceptualization, M.K.H., H.K.; methodology, H.K. M.K.H.; validation and scrutinization,  
198 D.K.M, H.K. M.K.H.; investigation, M.K.H., H.K.; writing-original draft preparation, H.K.,  
199 T.T.T., M.K.H., L.B., M.A.H.C., M.D.I., M.R.; review and editing, D.K.M., M.K.H., H.K.;  
200 supervision, D.K.M.; All authors have read and agreed to the current version of the manuscript.

201 **Acknowledgments**

202 We would like to accolade all the research assistants of the project who assisted in data  
203 collection.

204 **Reference**

205 Abdelrahman RM (2020) Metacognitive awareness and academic motivation and their impact on  
206 academic achievement of Ajman University students. *Heliyon* 6:e04192.  
207 <https://doi.org/10.1016/j.heliyon.2020.e04192>

208 Akaslan D, Law EL (2011a) Measuring teachers’ readiness for e-learning. In: *IEEE Global*



- 209           Engineering Education Conference. pp 481–490
- 210 Akaslan D, Law ELC (2011b) Measuring student e-learning readiness: A case about the subject  
211           of electricity in higher education institutions in Turkey. In: Lecture Notes in Computer  
212           Science (including subseries Lecture Notes in Artificial Intelligence and Lecture Notes in  
213           Bioinformatics). pp 209–218
- 214 Al-Amin M, Zubayer A Al, Deb B, Hasan M (2021) Status of tertiary level online class in  
215           Bangladesh: students’ response on preparedness, participation and classroom activities.  
216           Heliyon 7:e05943. <https://doi.org/10.1016/j.heliyon.2021.e05943>
- 217 Ali M, Khaled Hossain SM, Ahmed T (2018) Effectiveness of E-learning for university students:  
218           evidence from Bangladesh. Asian J Empir Res 8:352–360.  
219           <https://doi.org/10.18488/journal.1007/2018.8.10/1007.10.352.360>
- 220 Beeckman D, Schoonhoven L, Boucqué H, et al (2008) Pressure ulcers: E-learning to improve  
221           classification by nurses and nursing students. J Clin Nurs 17:1697–1707.  
222           <https://doi.org/10.1111/j.1365-2702.2007.02200.x>
- 223 Beqiri MS, Chase NM, Bishka A (2009) Online Course Delivery: An Empirical Investigation of  
224           Factors Affecting Student Satisfaction. J Educ Bus 85:95–100.  
225           <https://doi.org/10.1080/08832320903258527>
- 226 Bigirwa JP, Ndawula S, Naluwemba EF (2020) E-learning adoption: Does the instructional  
227           design model matter? An explanatory sequential study on midwifery schools in Uganda. E-  
228           Learning Digit Media 17:460–481. <https://doi.org/10.1177/2042753020946286>
- 229 Bloomfield J, Roberts J, While A (2010) The effect of computer-assisted learning versus  
230           conventional teaching methods on the acquisition and retention of handwashing theory and  
231           skills in pre-qualification nursing students: A randomised controlled trial. Int J Nurs Stud  
232           47:287–294. <https://doi.org/10.1016/j.ijnurstu.2009.08.003>
- 233 Chen R (2016) Learner Perspectives of Online Problem-Based Learning and Applications from  
234           Cognitive Load Theory. 1–9. <https://doi.org/10.1177/1475725716645961>
- 235 Coopasami M, Knight S, Pete M (2017) e-Learning readiness amongst nursing students at the  
236           Durban University of Technology. Heal SA Gesondheid 22:300–306.

- 237 <https://doi.org/10.4102/hsag.v22i0.1059>
- 238 Dhawan S (2020) Online Learning: A Panacea in the Time of COVID-19 Crisis. *J Educ Technol*  
239 *Syst* 49:5–22. <https://doi.org/10.1177/0047239520934018>
- 240 Du S, Liu Z, Liu S, et al (2013) Web-based distance learning for nurse education: A systematic  
241 review. *Int Nurs Rev* 60:167–177. <https://doi.org/10.1111/inr.12015>
- 242 Elnakeeb M, Mahmoud S, Khalifa A (2016) The Relationship Between Online Learning  
243 Readiness and Social Interaction Anxiety among Nursing Students in Alexandria  
244 University. 2:140–152. <https://doi.org/10.5829/idosi.wjns.2016.140.152>
- 245 Fawaz M, Samaha A (2020) E-learning: Depression, anxiety, and stress symptomatology among  
246 Lebanese university students during COVID-19 quarantine. *Nurs Forum* 1–6.  
247 <https://doi.org/10.1111/nuf.12521>
- 248 Gega L, Norman IJ, Marks IM (2007) Computer-aided vs. tutor-delivered teaching of exposure  
249 therapy for phobia/panic: Randomized controlled trial with pre-registration nursing  
250 students. *Int J Nurs Stud* 44:397–405. <https://doi.org/10.1016/j.ijnurstu.2006.02.009>
- 251 Guenaga ML, Burger D, Oliver J (2004) Accessibility for e-Learning Environments. In: *Lecture*  
252 *Notes in Computer Science (including subseries Lecture Notes in Artificial Intelligence and*  
253 *Lecture Notes in Bioinformatics)*. Springer Verlag, pp 157–163
- 254 Heo JC, Han S (2018) Effects of motivation, academic stress and age in predicting self-directed  
255 learning readiness (SDLR): Focused on online college students. *Educ Inf Technol* 23:61–  
256 71. <https://doi.org/10.1007/s10639-017-9585-2>
- 257 Ho IMK, Cheong KY, Weldon A (2021) Predicting student satisfaction of emergency remote  
258 learning in higher education during COVID-19 using machine learning techniques. *PLoS*  
259 *One* 16:1–27. <https://doi.org/10.1371/journal.pone.0249423>
- 260 Horiuchi S, Yaju Y, Koyo M, et al (2009) Evaluation of a web-based graduate continuing  
261 nursing education program in Japan: A randomized controlled trial. *Nurse Educ Today*  
262 29:140–149. <https://doi.org/10.1016/j.nedt.2008.08.009>
- 263 Hossain A, Nasrullah SM, Tasnim Z, et al (2021) Seroprevalence of SARS-CoV-2 IgG

- 264 antibodies among health care workers prior to vaccine administration in Europe, the USA  
265 and East Asia: a systematic review and meta-analysis. *EClinicalMedicine* 33:.  
266 <https://doi.org/10.1016/j.eclinm.2021.100770>
- 267 Hsieh JPA, Rai A, Keil M (2008) Understanding digital inequality: Comparing continued use  
268 behavioral models of the socio-economically advantaged and disadvantaged. *MIS Q Manag*  
269 *Inf Syst* 32:97–126. <https://doi.org/10.2307/25148830>
- 270 Irvine AB, Bourgeois M, Billow M, Seeley JR (2007) Internet Training for Nurse Aides to  
271 Prevent Resident Aggression. *J Am Med Dir Assoc* 8:519–526.  
272 <https://doi.org/10.1016/j.jamda.2007.05.002>
- 273 Ivwighrehweta O, Igere MA (2014) Impact of the internet on academic performance of students  
274 in tertiary institutions in Nigeria. *Inf Impact* 5:47–56
- 275 Kobayashi M (2017) Students’ media preferences in online learning. *Turkish Online J Distance*  
276 *Educ* 18:4–15. <https://doi.org/10.17718/tojde.328925>
- 277 Lahti M, Hätönen H, Välimäki M (2014) Impact of e-learning on nurses’ and student nurses  
278 knowledge, skills, and satisfaction: A systematic review and meta-analysis. *Int. J. Nurs.*  
279 *Stud.* 51:136–149
- 280 Lee SM, Oh Y (2017) The mediator role of perceived stress in the relationship between academic  
281 stress and depressive symptoms among E-learning students with visual impairments. *J Vis*  
282 *Impair Blind* 111:123–134. <https://doi.org/10.1177/0145482x1711100204>
- 283 Mayer RE (2019) Thirty years of research on online learning. 152–159.  
284 <https://doi.org/10.1002/acp.3482>
- 285 Mohamed Ali WG (2016) Nursing students’ readiness for e-learning experience. *Gynecol Obstet*  
286 6:.. <https://doi.org/10.4172/2161-0932.1000388>
- 287 Mutambik I, Lee J, Almuqrin A (2020) Role of gender and social context in readiness for e-  
288 learning in Saudi high schools. *Distance Educ* 41:515–539.  
289 <https://doi.org/10.1080/01587919.2020.1821602>
- 290 Neema-Abooki P, Kitawi A (2014) Impact of e-learning strategy on students’ academic

- 291 performance at strathmore University, Kenya. *Makerere J High Educ* 6:99.  
292 <https://doi.org/10.4314/majohe.v6i1.6>
- 293 Ngampornchai A, Adams J (2016) Students' acceptance and readiness for E-learning in  
294 Northeastern Thailand. *Int J Educ Technol High Educ* 13:34.  
295 <https://doi.org/10.1186/s41239-016-0034-x>
- 296 Ong CS, Lai JY (2006) Gender differences in perceptions and relationships among dominants of  
297 e-learning acceptance. *Comput Human Behav* 22:816–829.  
298 <https://doi.org/10.1016/j.chb.2004.03.006>
- 299 Padalino Y, Peres HHC (2007) E-learning: a comparative study for knowledge apprehension  
300 among nurses. *Rev Lat Am Enfermagem* 15:397–403. <https://doi.org/10.1590/s0104->  
301 [11692007000300006](https://doi.org/10.1590/s0104-11692007000300006)
- 302 Pillay H, Irving K, Tones M (2007) Validation of the diagnostic tool for assessing tertiary  
303 students' readiness for online learning. *High Educ Res Dev* 26:217–234.  
304 <https://doi.org/10.1080/07294360701310821>
- 305 Raman RA (2016) Attitudes and behavior of Ajman University of Science and Technology  
306 students towards the environment. *IAFOR J Educ* 4:69–88.  
307 <https://doi.org/10.22492/ije.4.1.04>
- 308 Ramírez-Correa PE, Arenas-Gaitán J, Rondán-Cataluña FJ (2015) Gender and acceptance of e-  
309 learning: A multi-group analysis based on a structural equation model among college  
310 students in Chile and Spain. *PLoS One* 10:1–17.  
311 <https://doi.org/10.1371/journal.pone.0140460>
- 312 Rouleau G, Gagnon MP, Côté J, et al (2019) Effects of e-learning in a continuing education  
313 context on nursing care: Systematic review of systematic qualitative, quantitative, and  
314 mixed-studies reviews. *J. Med. Internet Res.* 21:e15118
- 315 Salehi H, Shojaee M, Sattar S (2014) Using E-Learning and ICT Courses in Educational  
316 Environment: A Review. *English Lang Teach* 8:63–70. <https://doi.org/10.5539/elt.v8n1p63>
- 317 Sheen STH, Chang WY, Chen HL, et al (2008) E-learning education program for registered  
318 nurses: The experience of a teaching medical center. *J Nurs Res* 16:195–201.

- 319 <https://doi.org/10.1097/01.JNR.0000387306.34741.70>
- 320 Smith PJ (2005) Learning preferences and readiness for online learning. *Educ Psychol* 25:3–12.
- 321 <https://doi.org/10.1080/0144341042000294868>
- 322 Soydal R, Alir G, Ünal Y (2011) Are Turkish universities ready for e-learning: A case of  
323 Hacettepe University Faculty of Letters. In: *Information Services and Use*. IOS Press, pp  
324 281–291
- 325 T M, S A, Aditya KS, Jha GK (2020) Students’ Perception and Preference for Online Education  
326 in India During COVID -19 Pandemic. *SSRN Electron J*.
- 327 <https://doi.org/10.2139/ssrn.3596056>
- 328 Ünal Y, Alir G, Soydal İ (2014) Students readiness for e-learning: An assessment on hacettepe  
329 university department of information management. *Commun Comput Inf Sci* 423:137–147.
- 330 [https://doi.org/10.1007/978-3-662-44412-2\\_13](https://doi.org/10.1007/978-3-662-44412-2_13)
- 331 Wei H-C, Chou C (2020) Online learning performance and satisfaction: do perceptions and  
332 readiness matter? *Distance Educ* 41:48–69. <https://doi.org/10.1080/01587919.2020.1724768>
- 333 Yukselturk E, Bulut S (2007) Predictors for Student Success in an Online Course
- 334 Zimmerman BJ, Greenberg D, Weinstein CE (1994) Self-regulating academic study time: A  
335 strategy approach. *Self-Regulation Learn Perform* 181–199
- 336 DU to hold final exams online if Covid-19 crisis continues | Dhaka Tribune
- 337
- 338
- 339
- 340
- 341
- 342
- 343



371  
372  
373  
374  
375  
376  
377  
378  
379  
380  
381  
382  
383  
384  
385  
386  
387  
388  
389  
390  
391  
392  
393  
394  
395  
396  
397  
398

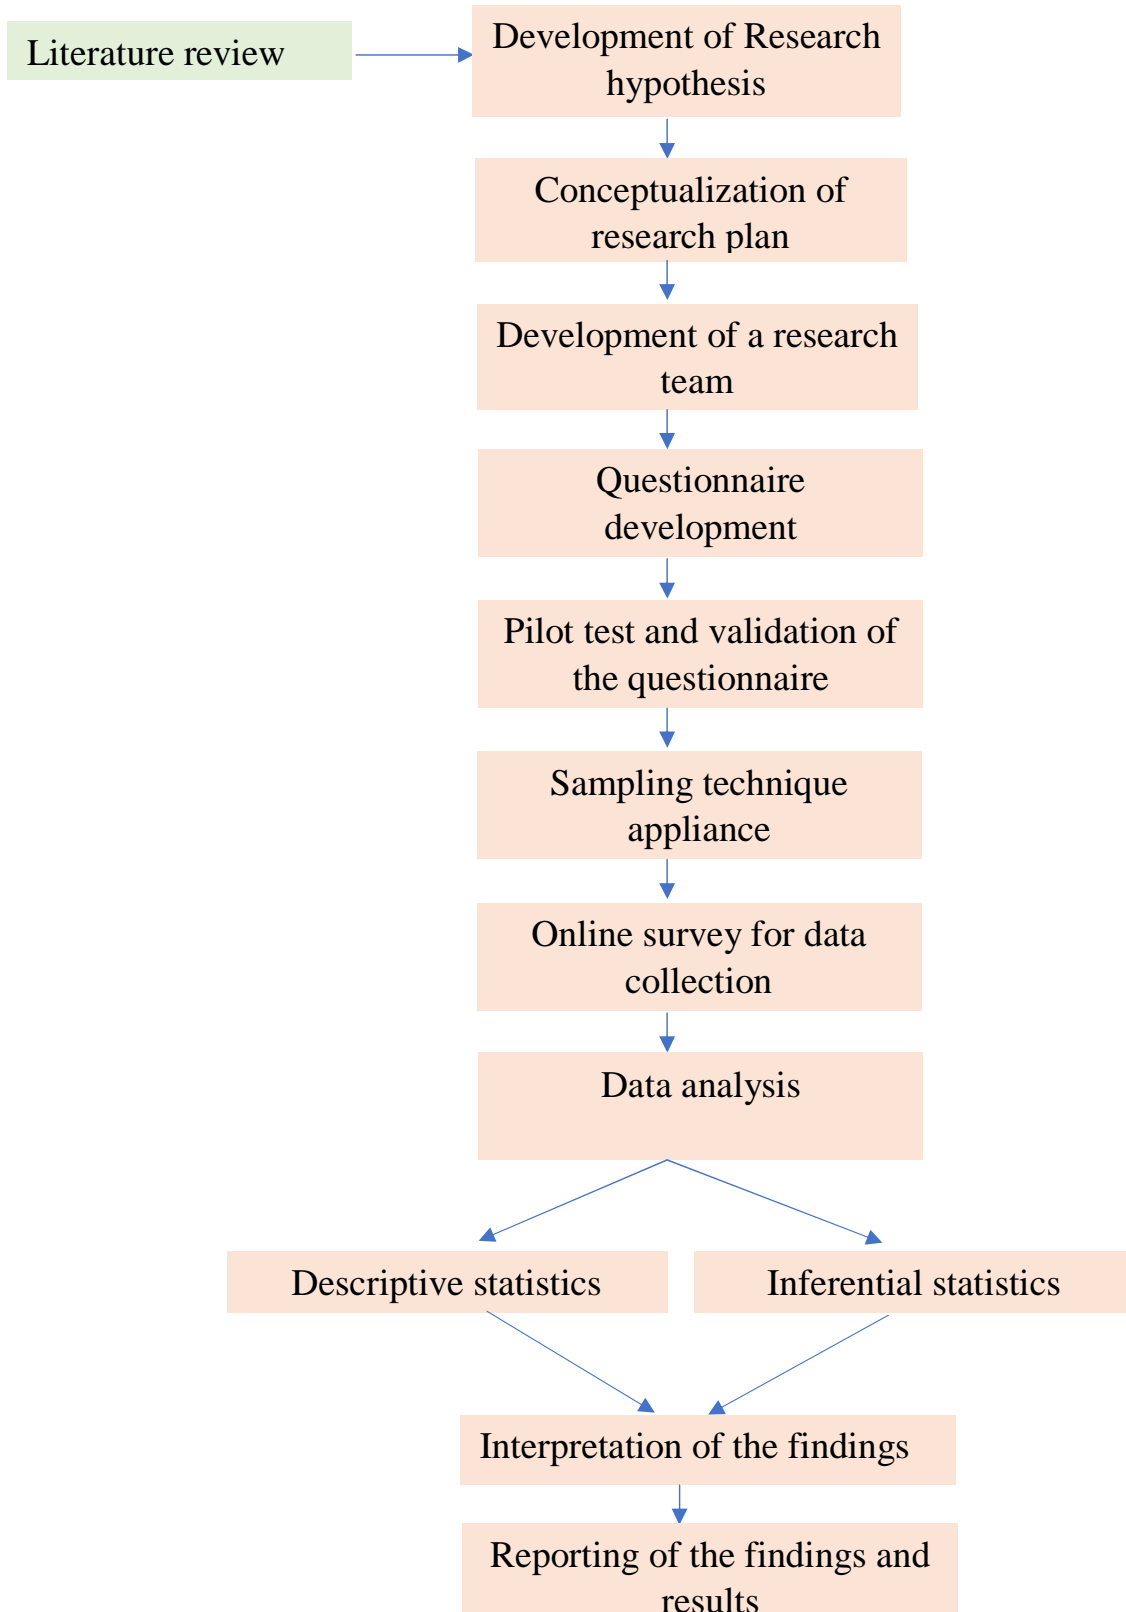

399

400

401

402

403 **Figure 2: Workflow of the study**
